# Supplementary material for: Nrf2 dictates the neuronal survival and differentiation of embryonic zebrafish harboring compromised alanyl-tRNA synthetase
Source: Oxford University Press journal article supplement (doi:10.1242/dev.200342), 2022-08-05
Supplement: dev200342supp.pdf [file dev200342supp.pdf]

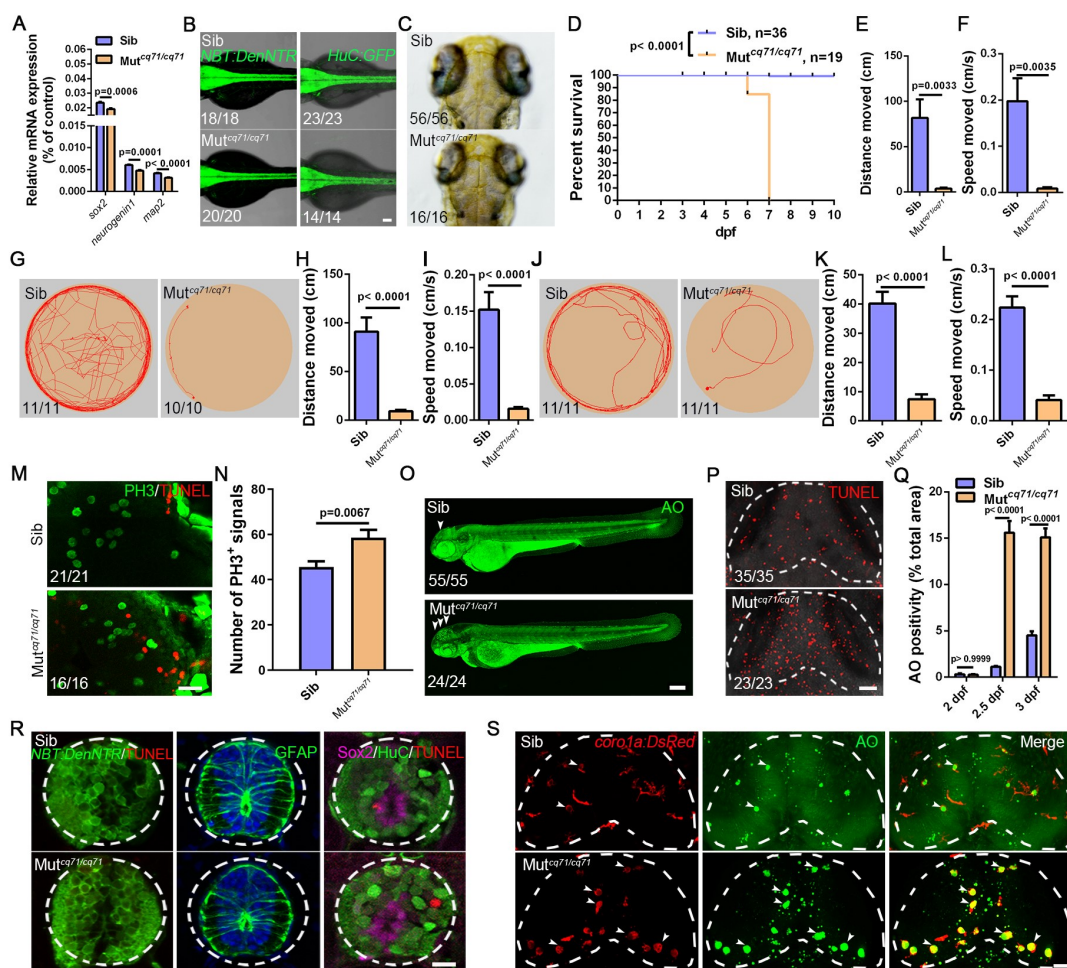

**Fig. S1. Compromised neurogenesis in *Mut<sup>cq71/cq71</sup>* mutants.**

- A.** The relative expression of *sox2*, *neurogenin1* and *map2* in the head of 2.5 dpf siblings and *Mut<sup>cq71/cq71</sup>* mutants by qRT-PCR (Mean  $\pm$  SEM; *sox2*: sibling,  $0.0235 \pm 0.0006$   $n=6$ , *Mut<sup>cq71/cq71</sup>*,  $0.0192 \pm 0.0006$   $n=6$ ; *neurogenin1*: sibling,  $0.0060 \pm 0.0001$   $n=6$ , *Mut<sup>cq71/cq71</sup>*,  $0.0047 \pm 0.0002$   $n=6$ ; *map2*: sibling,  $0.0042 \pm 0.0001$   $n=6$ , *Mut<sup>cq71/cq71</sup>*,  $0.0031 \pm 0.0001$   $n=6$ ; two independent clutches; unpaired t-test).
- B.** The fluorescent images of NBT-DenNTR<sup>+</sup> and HuC-GFP<sup>+</sup> signals in the corresponding reporter larvae.
- C.** Bright-field images of the head morphologies.
- D.** Kaplan–Meier survival curve (log-rank/Mantel–Cox statistic).
- E–F.** The statistical data of overall distance (E) (Mean  $\pm$  SEM; sibling,  $81.74 \pm 20.34$   $n=6$ ; *Mut<sup>cq71/cq71</sup>*,  $3.55 \pm 1.22$   $n=6$ ; two independent clutches; unpaired t-test) and speed (F) (Mean  $\pm$  SEM; sibling,  $0.20 \pm 0.05$   $n=6$ ; *Mut<sup>cq71/cq71</sup>*,  $0.01 \pm 0.002$   $n=6$ ; two independent clutches; unpaired t-test) of the spontaneous swimming behaviors.

**G-I.** Representative movement traces after needle touch (G) and the statistical data of overall distance (H) (Mean  $\pm$  SEM; sibling,  $40.18 \pm 3.97$  n=11; Mut<sup>cq71/cq71</sup>,  $7.42 \pm 1.68$  n=11; two independent clutches; unpaired t-test) and speed (I) (Mean  $\pm$  SEM: sibling,  $0.22 \pm 0.02$  n=11; Mut<sup>cq71/cq71</sup>,  $0.041 \pm 0.01$  n=11; two independent clutches; unpaired t-test) **J-L.** Representative movement traces after light dark stimulation (J) and the statistical data of overall distance (K) (Mean  $\pm$  SEM; sibling,  $91.06 \pm 14.58$  n=11; Mut<sup>cq71/cq71</sup>,  $9.38 \pm 1.39$  n=10; two independent clutches; unpaired t-test) and speed (L) (Mean  $\pm$  SEM; sibling,  $0.15 \pm 0.02$  n=11; Mut<sup>cq71/cq71</sup>,  $0.02 \pm 0.002$  n=10; two independent clutches; unpaired t-test).

**M-N.** The fluorescent images (M) and quantification (N) of PH3<sup>+</sup> (green) and TUNEL<sup>+</sup> (red) signals in the midbrains (Mean  $\pm$  SEM; sibling,  $45.64 \pm 2.44$  n=11; Mut<sup>cq71/cq71</sup>,  $58.55 \pm 3.50$  n=11; two independent clutches; unpaired t-test).

**O.** The fluorescent images of AO<sup>+</sup> signals in the whole embryos.

**P.** The immunofluorescent images of TUNEL in the midbrains (white dash lines).

**Q.** The quantification of AO<sup>+</sup> signals in the midbrains (Mean  $\pm$  SEM; 2 dpf: sibling,  $0.31 \pm 0.10$  n=13, Mut<sup>cq71/cq71</sup>,  $0.26 \pm 0.06$  n=15; 2.5 dpf: sibling,  $1.13 \pm 0.09$  n=15, Mut<sup>cq71/cq71</sup>,  $15.60 \pm 1.25$  n=15; 3 dpf: sibling,  $4.52 \pm 0.43$  n=17, Mut<sup>cq71/cq71</sup>,  $15.10 \pm 0.98$  n=18; two independent clutches; unpaired t-test).

**R.** The immunofluorescent images of NBT-DenNTR/TUNEL, GFAP, Sox2/HuC/TUNEL on the transverse sections of the spinal cord (white dash lines).

**S.** The fluorescent images of AO<sup>+</sup> and coro1a-DsRed<sup>+</sup> signals in the midbrains (white dash lines). The white arrowheads indicate the large AO<sup>+</sup> foci aggregated in the coro1a-DsRed<sup>+</sup> cells.

Scale bars in B, M, P, R, S, 20 $\mu$ m; O, 200  $\mu$ m.

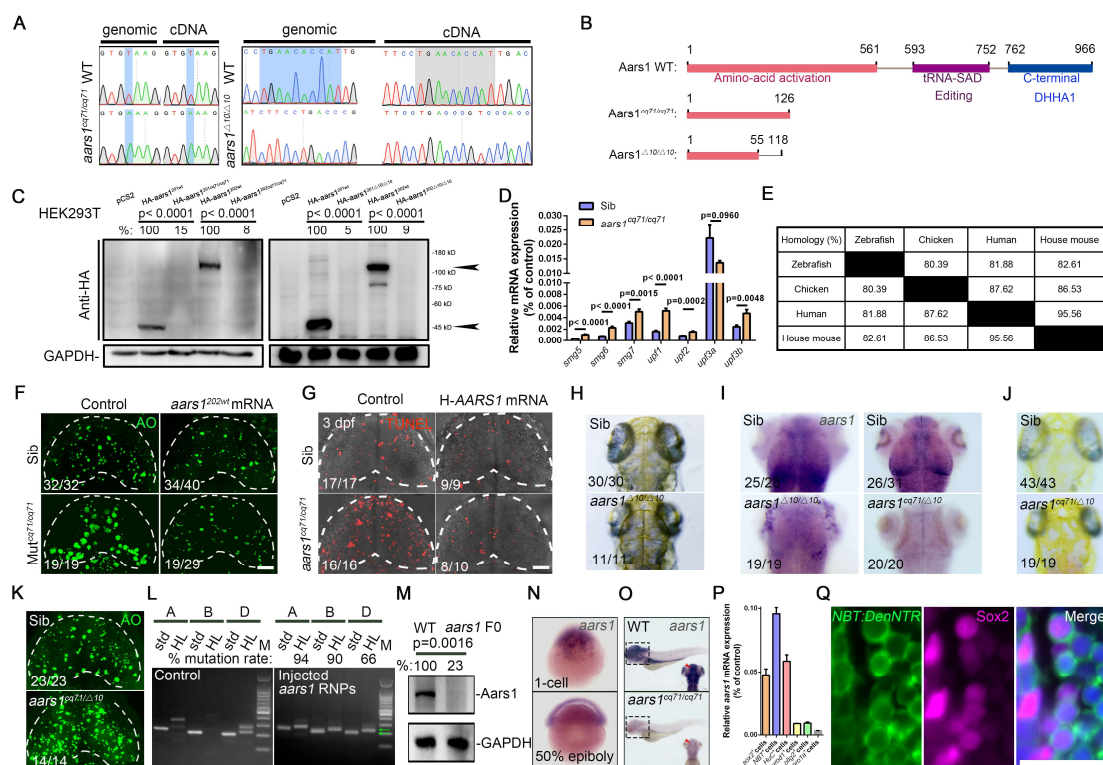

**Fig. S2. *aars1* is evolutionarily conserved in regulating neural survival.**

**A.** Sequencing data of genomic and cDNA of WT, *aars1*<sup>cq71/cq71</sup> and *aars1*<sup>Δ10/Δ10</sup> mutant embryos. The shaded areas show the mutation sites.

**B.** Schematic diagrams of Aars1 protein domains of WT (top), *aars1*<sup>cq71/cq71</sup> (middle) and *aars1*<sup>Δ10/Δ10</sup> mutants (bottom).

**C.** Western blot of HA-tagged WT and mutant forms of *aars1*<sup>201</sup> and *aars1*<sup>202</sup>. The GAPDH is used as a control. The protein levels of HA-*aars1*<sup>201cq71/cq71</sup> and HA-*aars1*<sup>201Δ10/Δ10</sup> reduced by 85% (P<0.0001) and 95% (P<0.0001), respectively, compared to that in *aars1*<sup>201wt</sup>. The protein levels of HA-*aars1*<sup>202cq71</sup> and HA-*aars1*<sup>202Δ10/Δ10</sup> reduced by 92% (P<0.0001) and 91% (P<0.0001), respectively, compared to that in *aars1*<sup>202wt</sup>.

**D.** The expression of NMD-related gene in the head by qRT-PCR (Mean ± SEM; n=8 in each group; two independent clutches; unpaired t-test).

**E.** AARS1 homology comparing among zebrafish, chicken, human and house mouse.

**F.** The fluorescent images AO<sup>+</sup> signals in the midbrains (white dash lines) of siblings and *aars1*<sup>cq71/cq71</sup> mutants after injecting *aars1*<sup>202wt</sup> mRNA.

**G.** The immunofluorescent images of TUNEL in the midbrains (white dash lines) of siblings and *aars1*<sup>cq71/cq71</sup> mutants after injecting H-AARS1 mRNA.

- H.** Bright-field images of *aars1*<sup>Δ10/Δ10</sup> and sibling heads.
- I.** WISH of *aars1* in the brains of *aars1*<sup>Δ10/Δ10</sup> (left), *aars1*<sup>cq71/Δ10</sup> (right) and their siblings.
- J.** Bright-field images of *aars1*<sup>cq71/Δ10</sup> and sibling heads.
- K.** The fluorescent images of AO<sup>+</sup> signals in the midbrains (white dash lines).
- L.** RNP target loci (A, B, D) of *aars1* amplified by the sequencing PCR primers (std, standard) or by a headloop primer (HL). Green arrows indicate the ~200-bp ladder band. The mutated efficiency: Guide A, 94%; Guide B, 90%; Guide D, 66%.
- M.** Western blot of Aars1. The protein levels of Aars1 reduced by 77% in the *aars1* F0 compared to that in the WT control (P=0.0016).
- N-O.** WISH of *aars1* at different stages.
- P.** qRT-PCR of *aars1* transcripts in the *sox2*<sup>+</sup>, *NBT*<sup>+</sup>, *HuC*<sup>+</sup>, *neurod1*<sup>+</sup>, *olig2*<sup>+</sup> and *coro1a*<sup>+</sup> cells (Mean ± SEM; *sox2*<sup>+</sup> 0.048 ± 0.005 n=8; *NBT*<sup>+</sup> 0.096 ± 0.005 n=8; *HuC*<sup>+</sup> 0.059 ± 0.005 n=8; *neurod1*<sup>+</sup> 0.009 ± 0.0001 n=8; *olig2*<sup>+</sup> 0.009 ± 0.001 n=8; *coro1a*<sup>+</sup> 0.003 ± 0.0001 n=8; two independent clutches).
- Q.** The immunofluorescent images of Sox2 and *NBT:DenNTR* in the brains after double staining. Scale bars in F, G, K, P, 20 μm.

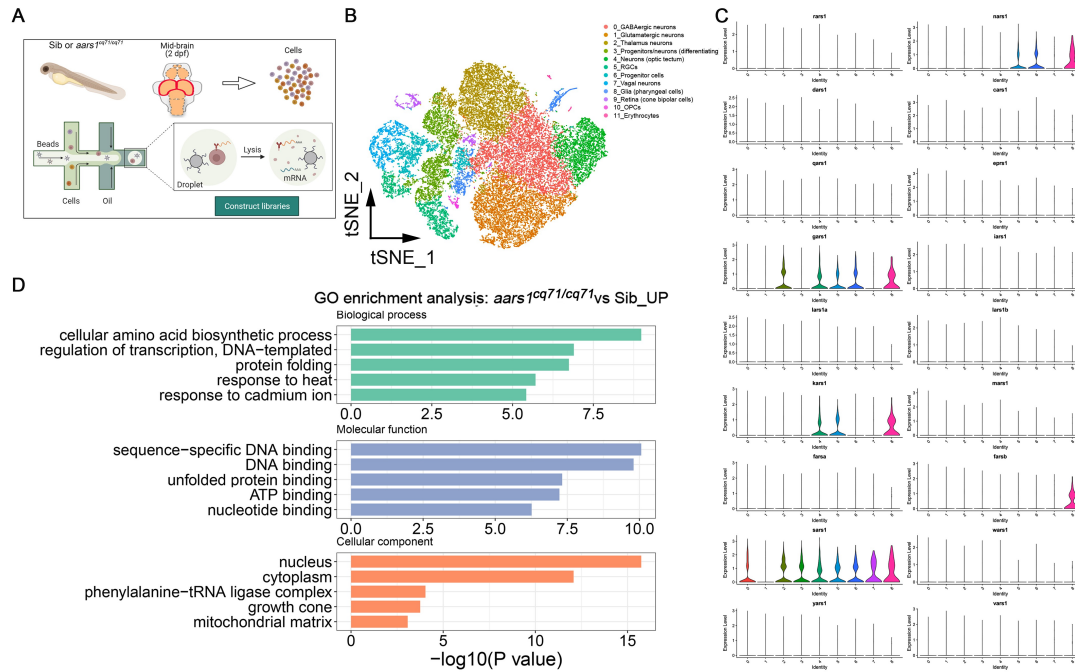

**Fig. S3. GO analysis and differential expression of aminoacyl-tRNA synthetases in neuronal progenitors.**

**A.** Schematic workflow of scRNA-seq.

**B.** Graph-based clustering of collected cells from siblings and *aars1<sup>107/107</sup>* mutants.

**C.** Violin plots (VLN) showing the transcript intensities of various aminoacyl-transfer RNA (tRNA) synthetases in nine neural cell clusters.

**D.** GO enrichment analysis of the five most affected signaling pathways in biological process, molecular function and cellular component in the *aars1<sup>107/107</sup>* PCs.

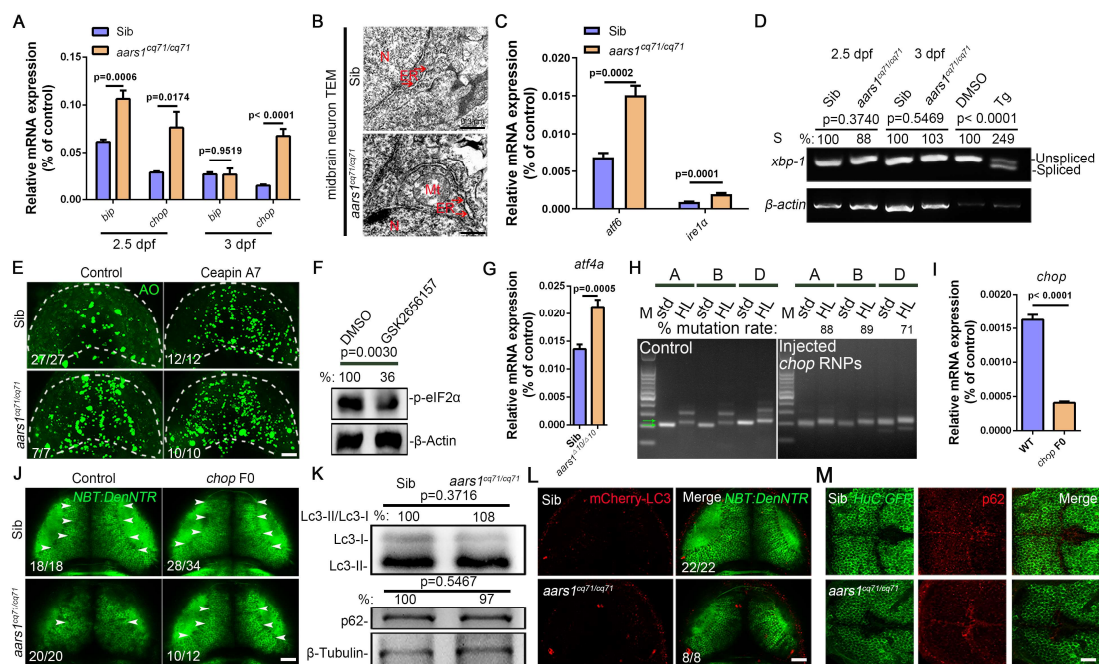

**Fig. S4. The Perk signaling but not autophagy pathway is activated in *aars1<sup>cq71/cq71</sup>* mutants.**

**A.** The transcript amounts of *bip* and *chop* in the head by qRT-PCR (Mean  $\pm$  SEM; 2.5 dpf: sibling *bip*  $0.0611 \pm 0.0026$   $n=6$ , *aars1<sup>cq71/cq71</sup>* *bip*  $0.1064 \pm 0.0089$   $n=6$ , sibling *chop*  $0.0299 \pm 0.0013$   $n=6$ , *aars1<sup>cq71/cq71</sup>* *chop*  $0.0764 \pm 0.0166$   $n=6$ ; 3 dpf: sibling *bip*  $0.0271 \pm 0.0023$   $n=6$ , *aars1<sup>cq71/cq71</sup>* *bip*  $0.0267 \pm 0.0065$   $n=6$ , *chop* sibling  $0.0149 \pm 0.0013$   $n=6$ , *aars1<sup>cq71/cq71</sup>* *chop*  $0.0676 \pm 0.0075$   $n=6$ ; two independent clutches; unpaired t-test).

**B.** Endoplasmic reticulum structure in siblings and *aars1<sup>cq71/cq71</sup>* at 3 dpf by transmission electron microscope. N: nucleus; ER: endoplasmic reticulum (red arrows); Mt: mitochondria.

**C.** The transcript amounts of *atf6* and *ire1a* in the head by qRT-PCR (Mean  $\pm$  SEM; *atf6*: sibling  $0.0069 \pm 0.0006$   $n=6$ , *aars1<sup>cq71/cq71</sup>*  $0.0151 \pm 0.0013$   $n=6$ ; *ire1a*: sibling  $0.0009 \pm 0.0001$   $n=6$ , *aars1<sup>cq71/cq71</sup>*  $0.0020 \pm 0.0002$   $n=6$ ; two independent clutches; unpaired t-test).

**D.** RT-PCR of *xbp-1* splicing in siblings and *aars1<sup>cq71/cq71</sup>*. Treating 24 hpf WT embryos with Tg for 1 h is used as a positive control. S, spliced *xbp-1*. The spliced-*xbp-1* levels are increased by 149% ( $P < 0.0001$ ) in the Tg group relative to the controls.

**E.** The fluorescent images of AO<sup>+</sup> signals in the midbrains (white dash lines) of siblings and *aars1<sup>cq71/cq71</sup>* mutants with or without Ceapin A7 treatment.

- F.** Western blotting of p-eIF2 $\alpha$ . The p-eIF2 $\alpha$  protein levels are reduced by 64% in the GSK2656157 group compared to the DMSO control (P=0.0030).
- G.** The transcript levels of *atf4a* in the head by qRT-PCR (Mean  $\pm$  SEM; sibling, 0.0136  $\pm$  0.0008 n=6; *aars1<sup>cq71/cq71</sup>*, 0.0212  $\pm$  0.0013 n=6; two independent clutches; unpaired t-test).
- H.** RNP target loci (A, B, D) of *chop* amplified by the sequencing PCR primers (std, standard) or by a headloop primer (HL). Green arrows indicate the ~200-bp ladder band. The mutated efficiency: Guide A, 88%; Guide B, 89%; Guide D, 71%.
- I.** The transcript amounts of *chop* by qRT-PCR (Mean  $\pm$  SEM; WT, 0.0016  $\pm$  0.0001 n=12; *chop* F0, 0.0004  $\pm$  0.0001 n=12; two independent clutches; unpaired t-test).
- J.** The fluorescent images of *NBT:DenNTR* in the brains of siblings and *aars1<sup>cq71/cq71</sup>* mutants after injecting *chop* RNPs. The white arrowheads indicate the NBT-DenNTR<sup>+</sup> signals.
- K.** Western blot of Lc3-II/Lc3-I and p62. The  $\beta$ -tubulin is used as a control.
- L.** The immunofluorescent staining images of mCherry-LC3 and *NBT:DenNTR* in the brains of siblings and *aars1<sup>cq71/cq71</sup>* mutants.
- M.** The immunofluorescent staining images of *HuC:GFP* and P62 on the transverse sections of the midbrains.
- Scale bars in E, H, J, K, 20  $\mu$ m; B, 0.3  $\mu$ m.

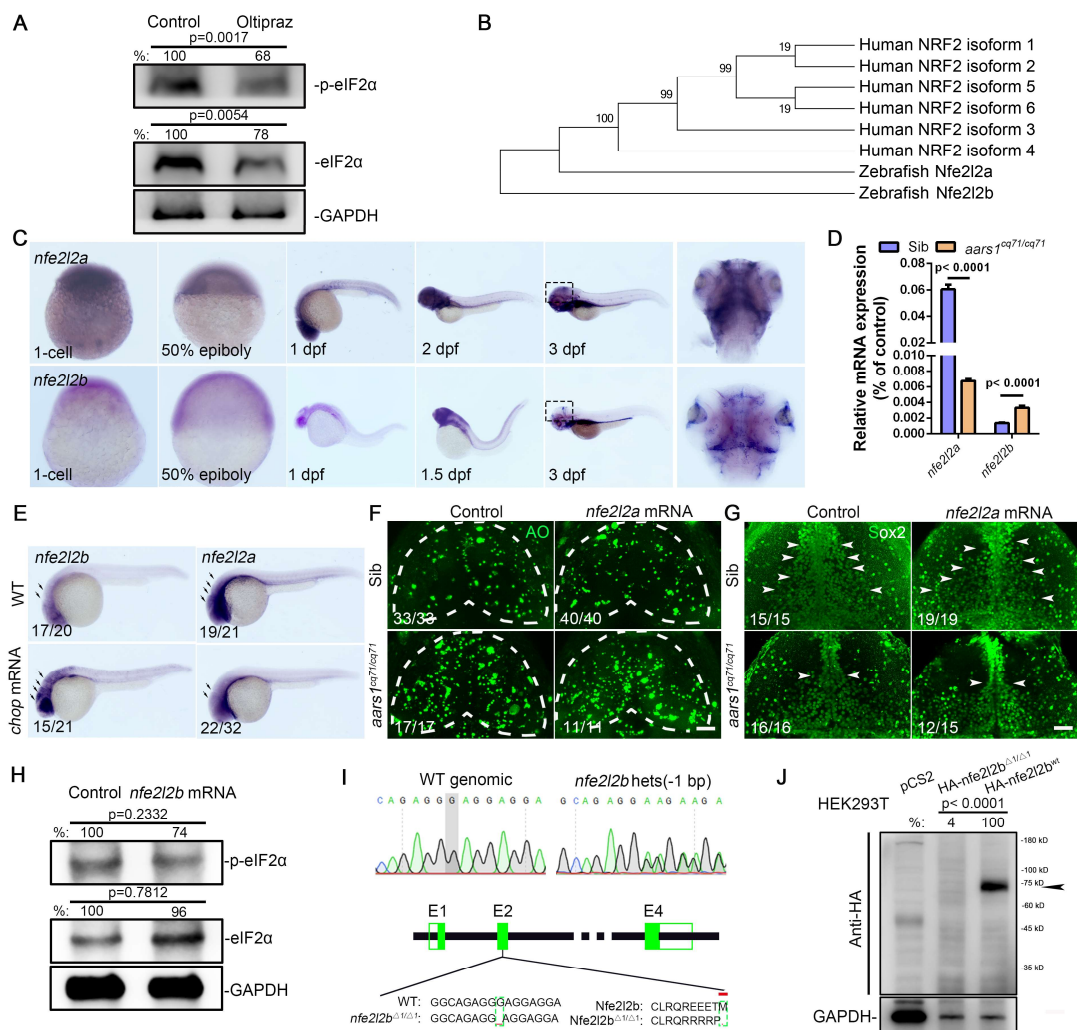

**Fig. S5. *nfe2l2b*, but not *nfe2l2a*, contributes to the regulation of neural survival in *aars1<sup>cq71</sup>*/*cq71* mutants.**

**A.** Western blot of p-eIF2 $\alpha$  and eIF2 $\alpha$  in the embryos treating with Oltipraz. The GAPDH is used as a control. The protein levels of p-eIF2 $\alpha$  and eIF2 $\alpha$  are reduced by 32% (P=0.0017) and 22% (P=0.0054) in the *aars1<sup>cq71/cq71</sup>* mutants compared to the control.

**B.** A phylogenetic tree of the full-length Nrf2 amino acid sequences constructed by the neighbor-joining method.

**C.** WISH of *nfe2l2a* (top) and *nfe2l2b* (bottom) at different stages.

**D.** The transcript amounts of *nfe2l2a* and *nfe2l2b* in the head by qRT-PCR (Mean  $\pm$  SEM; *nfe2l2a*: sibling 0.0605  $\pm$  0.0035 n=6, *aars1<sup>cq71/cq71</sup>* 0.0067  $\pm$  0.0002 n=6; *nfe2l2b*: sibling 0.0014  $\pm$  0.0001 n=6, *aars1<sup>cq71/cq71</sup>* 0.0033  $\pm$  0.0002 n=6; two independent clutches; unpaired t-test).

**E.** WISH of *nfe2l2b* (left) and *nfe2l2a* (right) in the embryos after injecting *chop* mRNA. The arrowheads indicate the signals.



**F-G.** The fluorescent images of AO<sup>+</sup> (F) and Sox2<sup>+</sup> (G) signals in the midbrains (white dash lines) after injecting *nfe2l2a* mRNA. White arrowheads indicate the Sox2<sup>+</sup> signals.

**H.** Western blot of p-eIF2 $\alpha$  and eIF2 $\alpha$  in the embryos. The GAPDH is used as a control. The p-eIF2 $\alpha$  protein levels are reduced by 26% (P=0.2332) in the *nfe2l2b* mRNA group. **I.** The genomic sequencing of targeted regions in WT and *nfe2l2b* <sup>$\Delta$ 1/+</sup> (upper). The shaded area highlights the mutation site. Deletion of 1 bp leads to the early termination of Nfe2l2b translation in *nfe2l2b* <sup>$\Delta$ 1/ $\Delta$ 1</sup> (bottom).

**J.** Western blot of HA. The GAPDH is used as a control. The protein levels of HA-*nfe2l2b* <sup>$\Delta$ 1/ $\Delta$ 1</sup> are reduced by 96% compared to HA-*nfe2l2b*<sup>wt</sup> (P<0.0001).

Scale bar in F, G, 20  $\mu$ m.

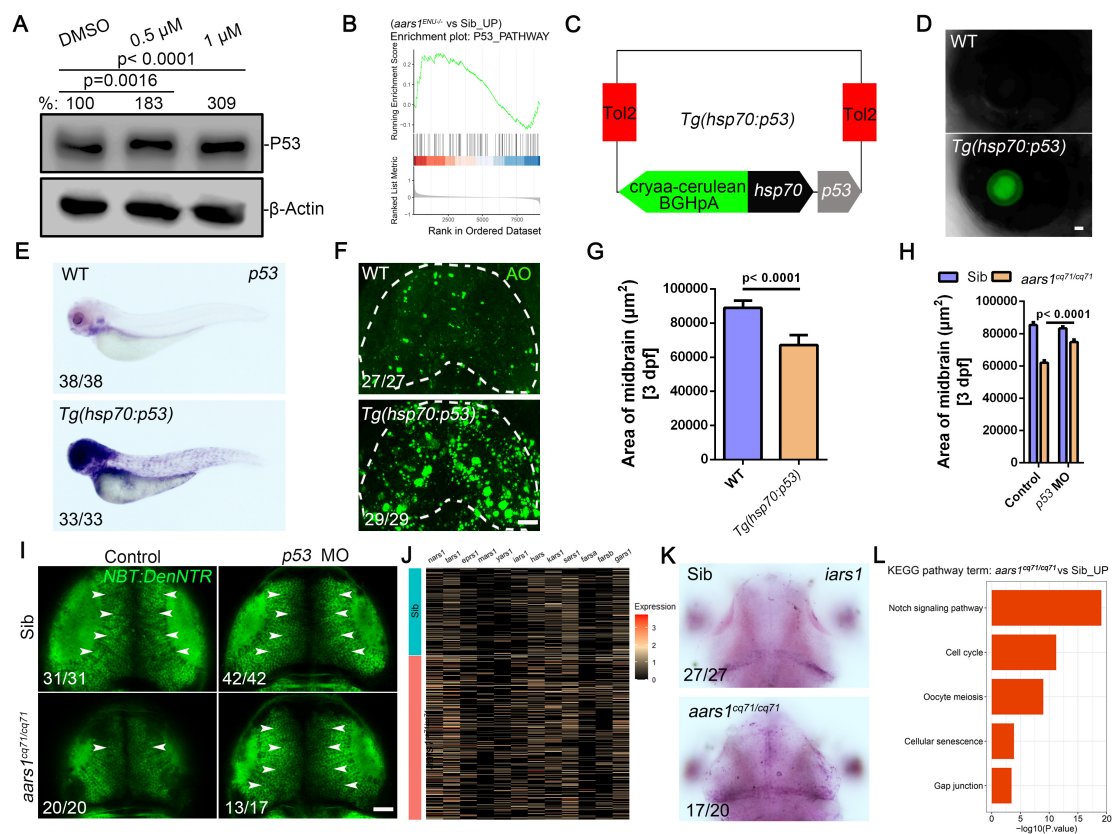

**Fig. S6. Over activation of P53 promotes neural apoptosis**

**A.** Western blot of P53 in 293T cells treating with 0.5  $\mu\text{M}$  or 1  $\mu\text{M}$  Tg. The  $\beta$ -Actin is used as a control. The protein levels of P53 are increased by 83% ( $P=0.0016$ ) and 209% ( $P<0.0001$ ) in the 0.5  $\mu\text{M}$  and 1  $\mu\text{M}$  Tg groups, respectively, compared to that in the control.

**B.** GSEA enrichment of the up-regulated P53 pathway in cluster 4 of *aars1*<sup>cq71/cq71</sup> mutants.

**C.** The construction of *pT2AL-hsp70:p53; cryaa:cerulean* vector.

**D.** Representative fluorescent images of the lens in *Tg(hsp70:p53)*.

**E.** WISH of *p53* in WT and *Tg(hsp70:p53)* embryos after heat shock.

**F.** The fluorescent images of AO<sup>+</sup> signals in the midbrains (white dash lines) of WT and *Tg(hsp70:p53)* after heat shock.

**G.** Quantification of the midbrain size of WT and *Tg(hsp70:p53)* after heat shock (Mean  $\pm$  SEM; WT, 88845  $\pm$  1656 n=7; *Tg(hsp70:p53)*, 67185  $\pm$  2194 n=7; two independent clutches; unpaired t-test).

**H.** Quantification of midbrain size (Mean  $\pm$  SEM; control: sibling, 85374.49  $\pm$  1833.10 n=9,

*aars1<sup>cq71/cq71</sup>*, 61988.01 ± 1592.02 n=9; *p53* MO: sibling, 83299.14 ± 1168.72 n=18, *aars1<sup>cq71/cq71</sup>*, 74753.43 ± 1586.78 n=12; two independent clutches; two-way ANOVA).

I. The fluorescent images of *NBT:DenNTR* in the brains of siblings and *aars1<sup>cq71/cq71</sup>* mutants after injecting *p53* MO. The arrowheads indicate the signals.

J. Heatmap of the up-regulated aminoacyl-transfer RNA (tRNA) synthetase genes in 2 dpf *aars1<sup>cq71/cq71</sup>* PCs.

K. WISH of *inars1* in siblings and *aars1<sup>cq71/cq71</sup>* mutants.

L. KEGG pathway term of the five up-regulated pathways in *aars1<sup>cq71/cq71</sup>* PCs.

Scale bar in D, F, I, 20 µm.

### Table S1. Primers used

[Click here to download Table S1](#)

### Table S2. Key resources

[Click here to download Table S2](#)

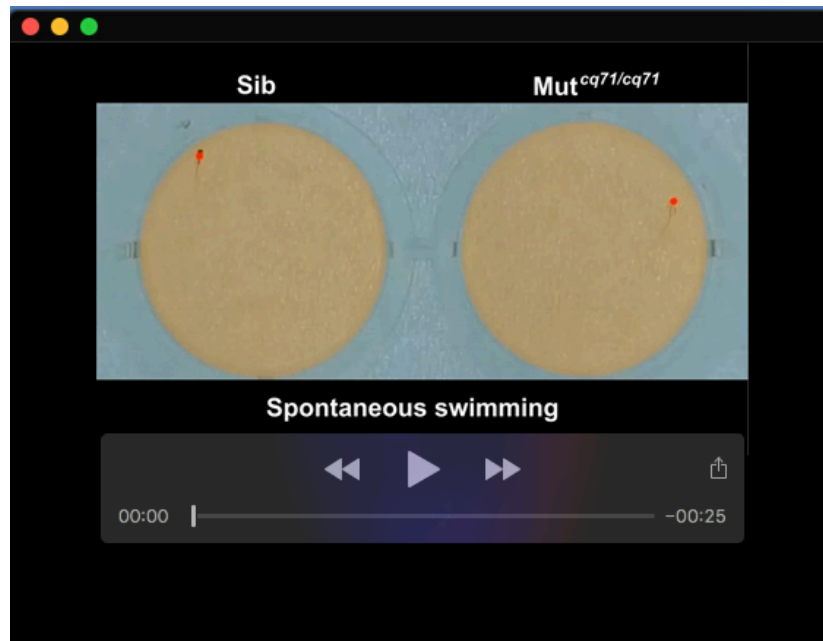

**Movie 1. Spontaneous swimming behavior of sibling and Mut<sup>cq71/cq71</sup> mutant embryos. Related to Figure 1.** Five minutes track records of the swimming behaviors on 3 dpf embryos after a 5-minute adaptation. The yellow circle area represents the imaging field. The red line represents the swimming track. This video presented the behavioral recording in Figure 1B.

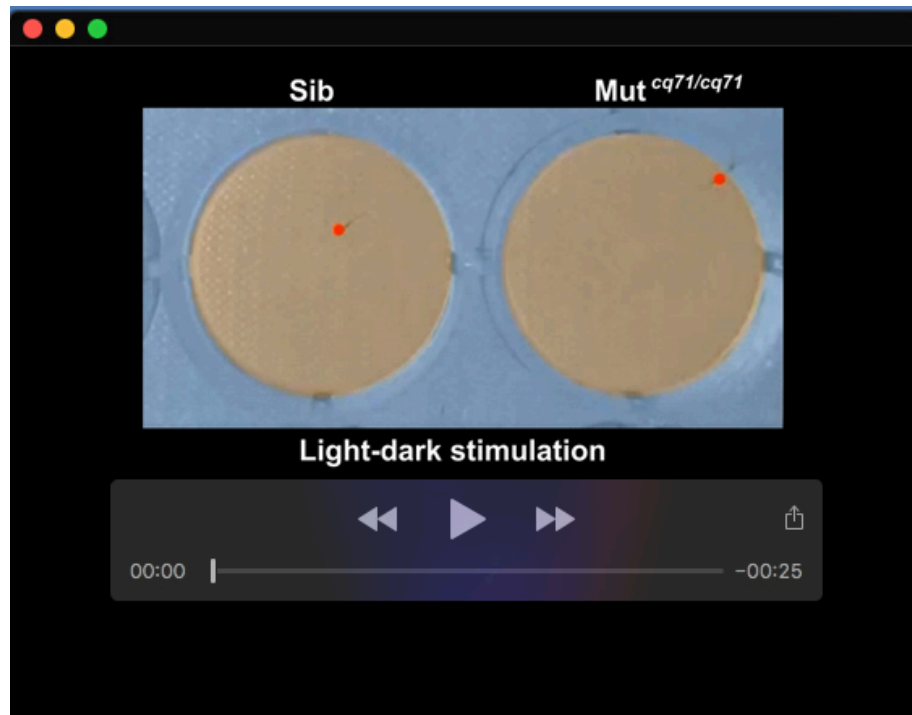

**Movie 2. The sibling and Mut<sup>cq71/cq71</sup> mutant reactions on the light-dark stimulation.**

**Related to Figure S1.** Ten minutes track records of the swimming behaviors on 5 dpf larvae after a 5-minute darkness stimulation. The yellow circle area represents the imaging field. The red line represents the swimming track. This video presented the behavioral recording in Supplemental 1G.

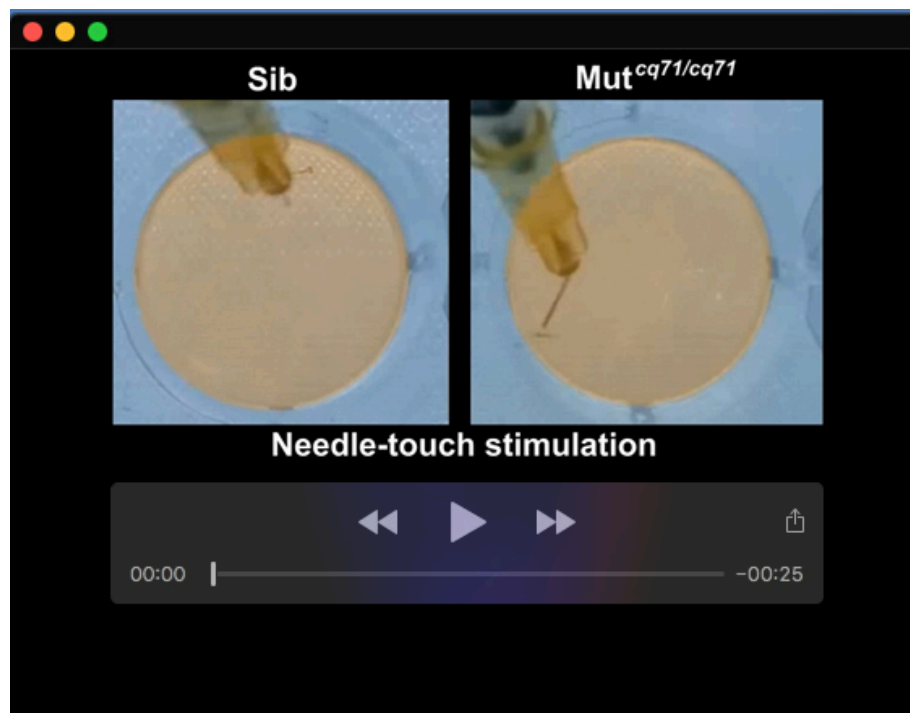

**Movie 3. The sibling and Mut<sup>cq71/cq71</sup> mutant reactions on the needle-touch stimulation. Related to Figure S1.** Three minutes track records of the swimming behaviors on 5 dpf larvae after a needle touch. The yellow circle area represents the imaging field. The red line represents the swimming track. This video presented the behavioral recording in Supplemental 1J.

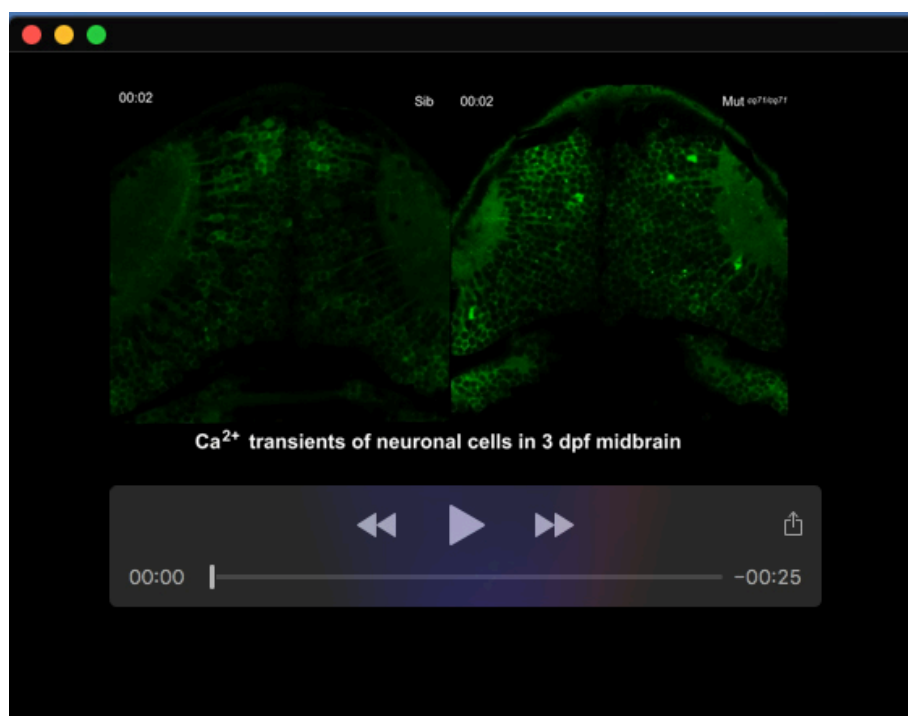

**Movie 4. Spontaneous  $\text{Ca}^{2+}$  activity in the midbrains of sibling and  $\text{Mut}^{cq71/cq71}$  mutant embryos. Related to Figure 1.** Simultaneous calcium imaging of neuronal cells in 3dpf midbrains of  $Tg(HuC:GCaMP6S)$  embryos. Acquisitions were performed with scanning at 1.2 Hz at an excitation of 488 nm. The resolution was designed by 512 x 512 pixels on  $Tg(HuC:GCaMP6s)$ . And the time-length of single-layer imaging was 252 seconds in total, with 200 cycles. The selected frame images were given in Figure 1C.
